# Supplementary material
Source: publisher figshare collection journal article supplement (https://acs.figshare.com/ndownloader/files/5456552)
Supplement: Supplementary file 1 [file 5456552]

## **Supporting Information**

# Aggregation induced FRET *via* Polymer-Surfactant Complexation: A New Strategy for the Detection of Spermine

*Akhtar Hussain Malik<sup>a</sup>, Sameer Hussain<sup>a</sup> and Parameswar Krishnan Iyer<sup>a,b\*</sup>*

<sup>a</sup>Department of Chemistry, Indian Institute of Technology Guwahati, Guwahati-781039, India.

<sup>b</sup>Centre for Nanotechnology, Indian Institute of Technology Guwahati, Guwahati, 781039,  
India

### AUTHOR INFORMATION

#### **Corresponding Author**

\*Tel: +91-361-258-2314 (O). Fax: +91-361-269-0762 / 258-2349.

E-mail: [pki@iitg.ernet.in](mailto:pki@iitg.ernet.in)

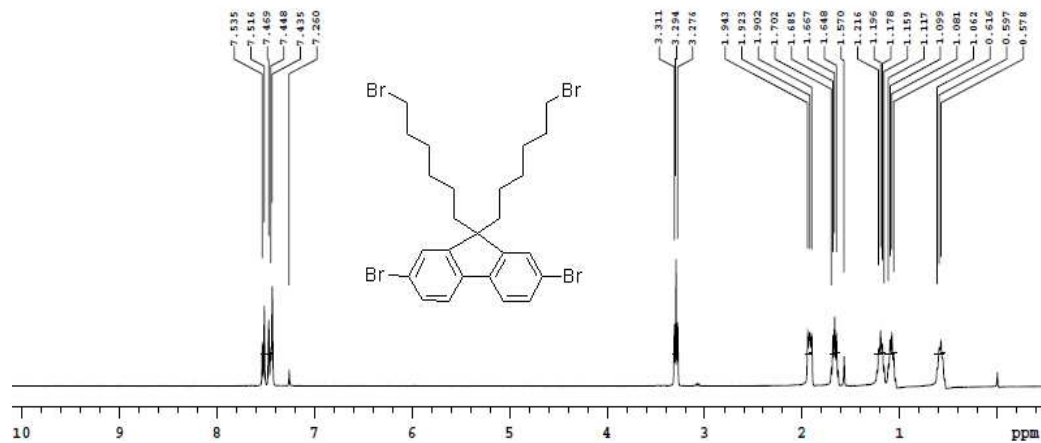

**Figure S1.**  $^1\text{H}$  NMR (400 MHz,  $\text{CDCl}_3$ ) spectrum of M0.

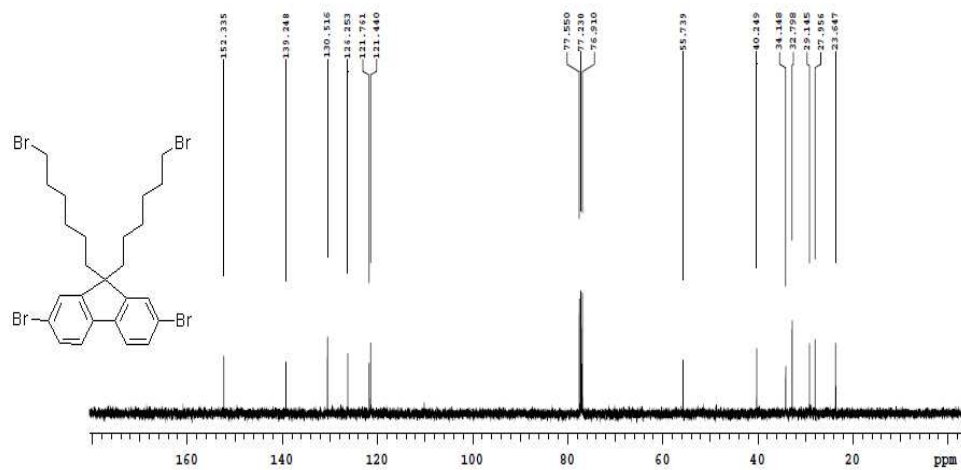

**Figure S2.**  $^{13}\text{C}$  NMR (100 MHz,  $\text{CDCl}_3$ ) spectrum of M0.

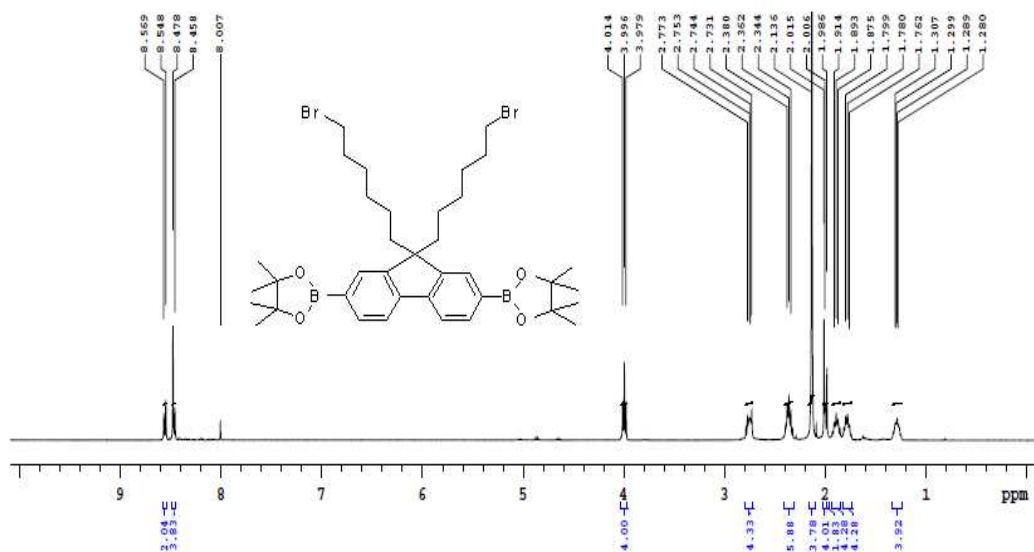

**Figure S3.** <sup>1</sup>H NMR (400 MHz, CDCl<sub>3</sub>) spectrum of M1.

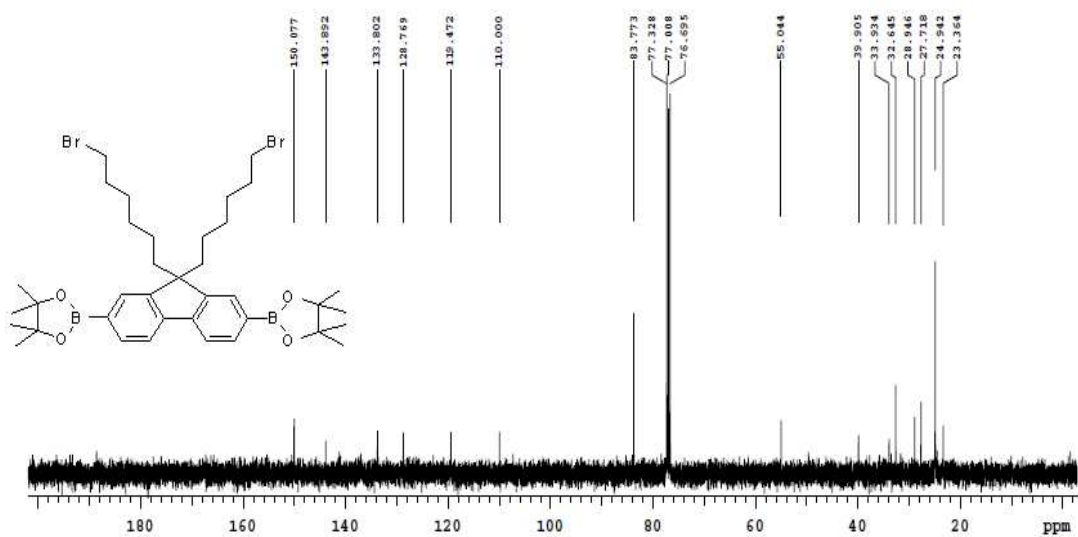

**Figure S4.** <sup>13</sup>C NMR (100 MHz, CDCl<sub>3</sub>) spectrum of M1.

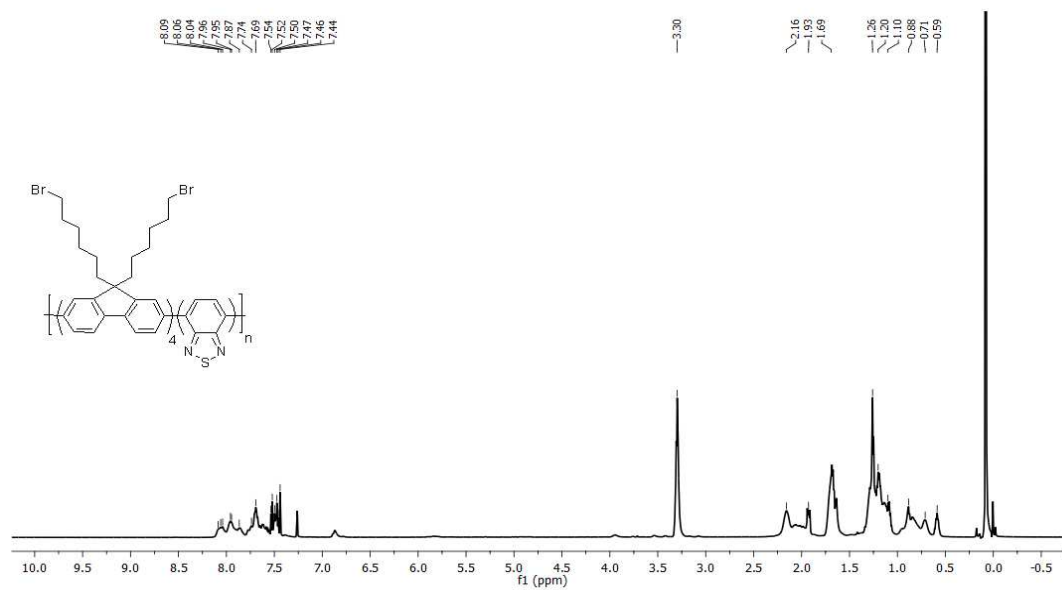

**Figure S5.**  $^1\text{H}$  NMR (600 MHz,  $\text{CDCl}_3$ ) spectrum of PFBT.

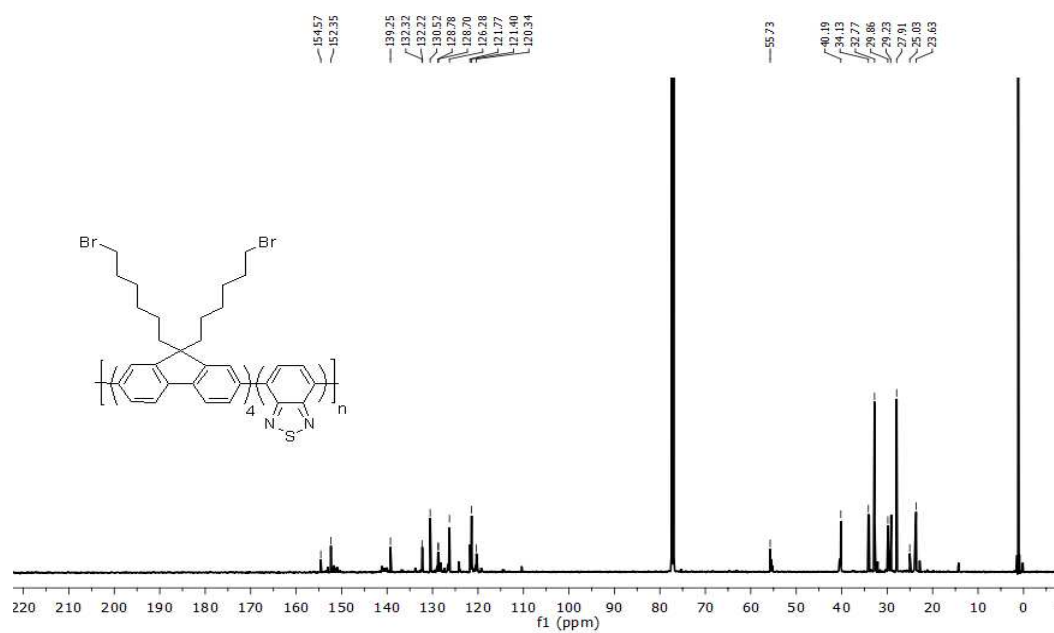

**Figure S6.**  $^{13}\text{C}$  NMR (150 MHz,  $\text{CDCl}_3$ ) spectrum of PFBT.

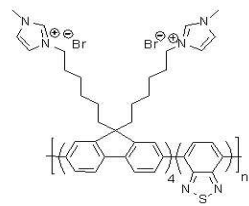

**Figure S7.**  $^1\text{H}$  NMR (600 MHz,  $\text{CD}_3\text{OD}$ ) spectrum of PFBT-MI.

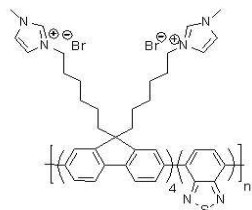

**Figure S8.**  $^{13}\text{C}$  NMR (150 MHz,  $\text{CD}_3\text{OD}$ ) spectrum of PFBT-MI.

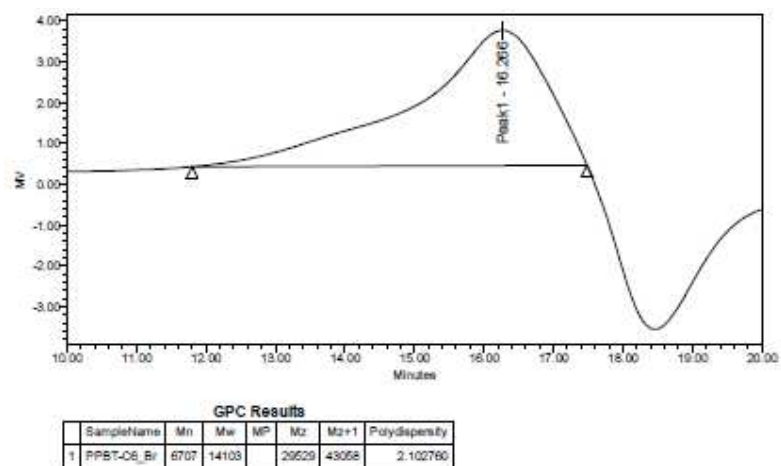

**Figure S9.** GPC chromatogram of PFBT.

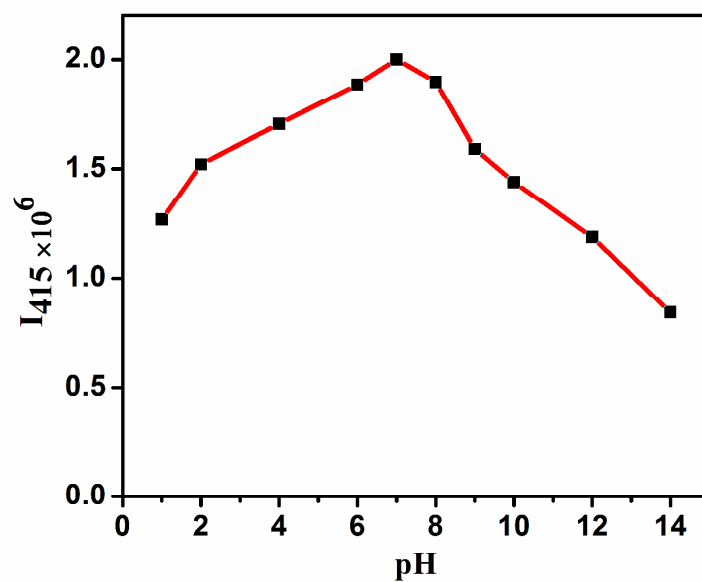

**Figure S10.** The pH dependent fluorescence response of PFBT-MI (6.6  $\mu\text{M}$ ) in different pH buffers.

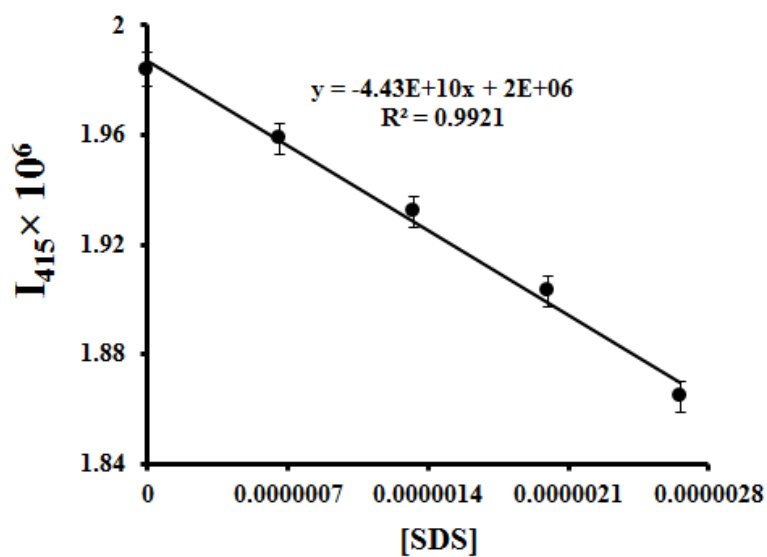

**Figure S11.** Detection limit plot for SDS.

$$\text{LOD} = 3 \times \sigma/k$$

$$\text{LOD} = 3 \times 1725.58 / 4.43 \times 10^{10}$$

$$= 0.12 \mu\text{M} \text{ (34 ppb)}$$

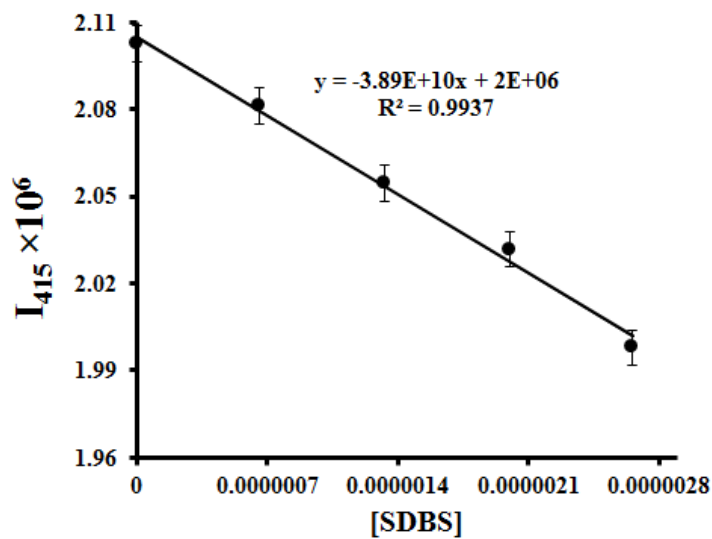

**Figure S12.** Detection limit plot for SDBS.

$$\text{LOD} = 3 \times \sigma/k$$

$$\text{LOD} = 3 \times 1725.58 / 3.89 \times 10^{10}$$

$$= 0.13 \mu\text{M} \text{ (45 ppb)}$$

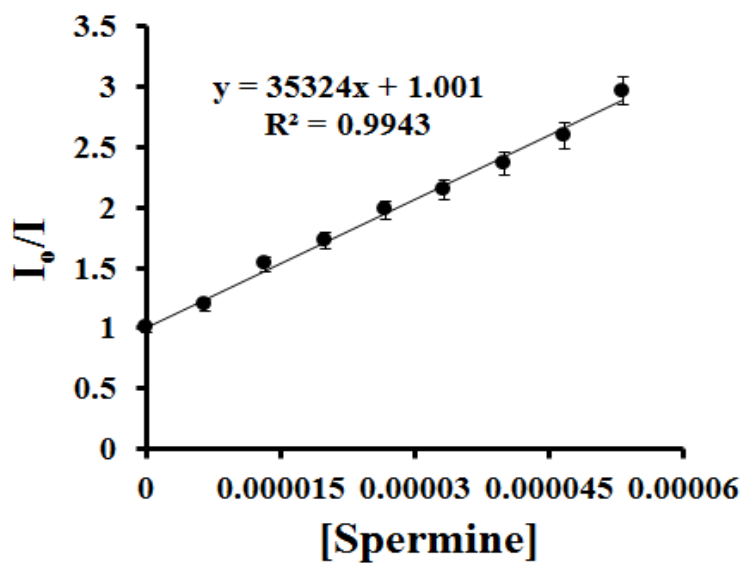

**Figure S13.** Stern-Volmer plot for spermine with PFBT-MI/SDS (6.6  $\mu$ M/ 18  $\mu$ M).

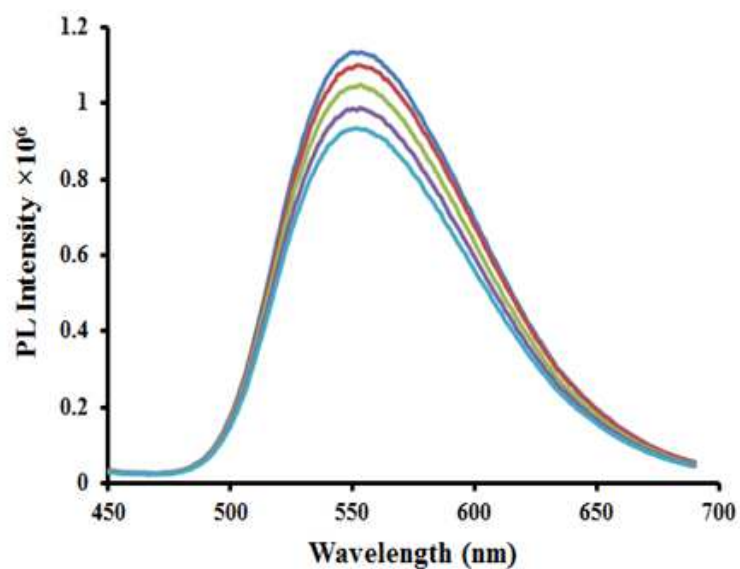

**Figure S14.** (a) Changes in the emission spectra of PFBT-MI/SDS (6.6  $\mu$ M/ 18  $\mu$ M) with various concentrations of spermine (0, 1.6, 3.3, 5.0, 6.6  $\mu$ M) in aqueous solution.

$$LOD = 3 \times \sigma/k$$

$$LOD = 3 \times 3363.20 / 3.0 \times 10^{10}$$

$$= 0.33 \mu\text{M} \text{ (66 ppb)}$$



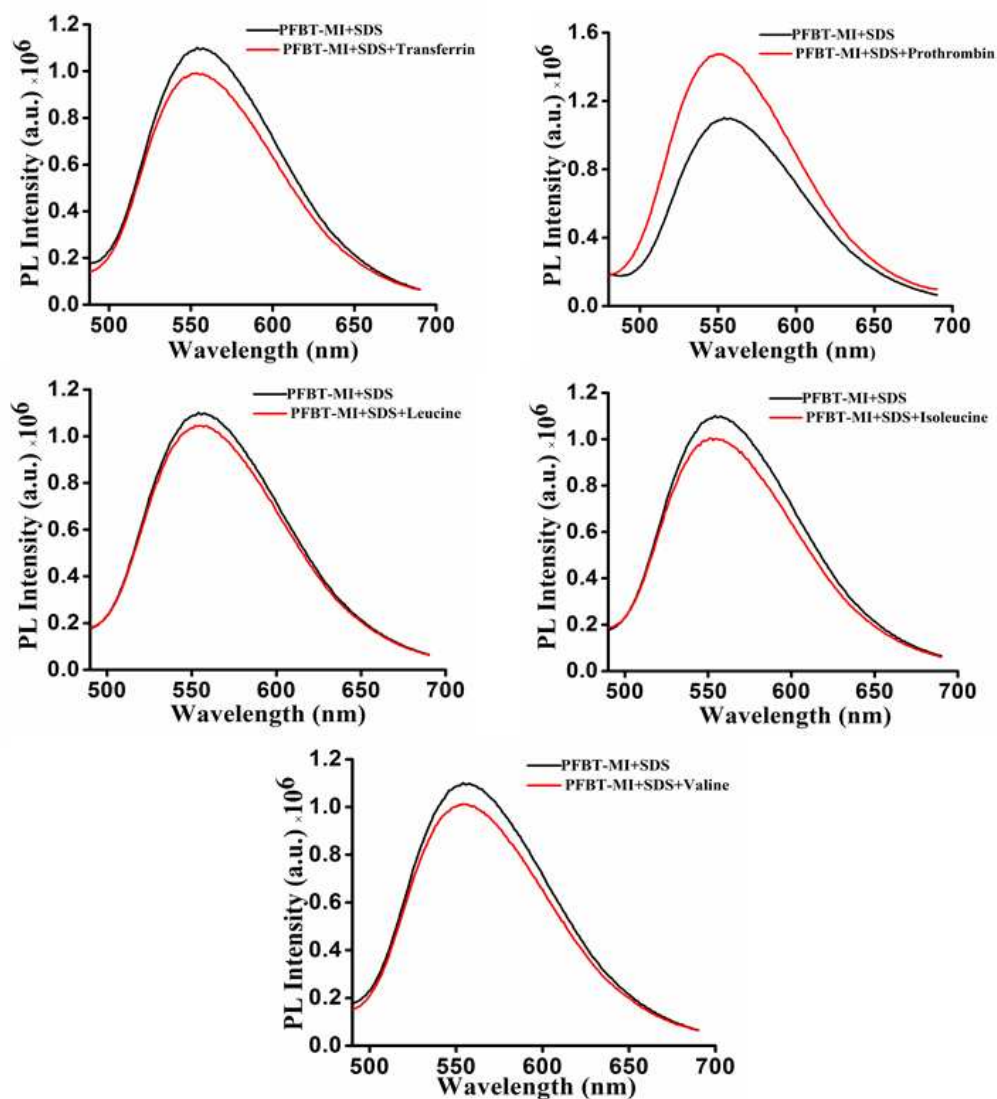

**Figure S15.** Effect of various cancer biomarkers (120  $\mu$ M) on the emission of PFBT-MI/SDS complex.

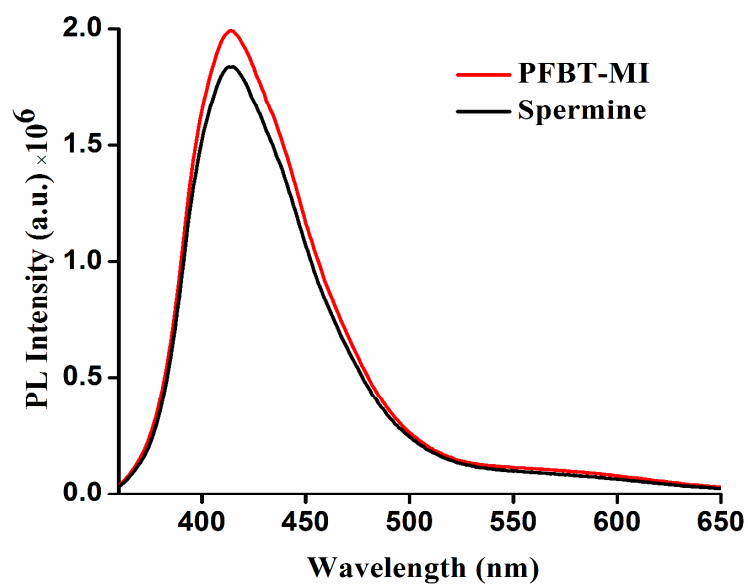

**Figure S16.** Effect of spermine (120  $\mu$ M) on the emission of PFBT-MI.

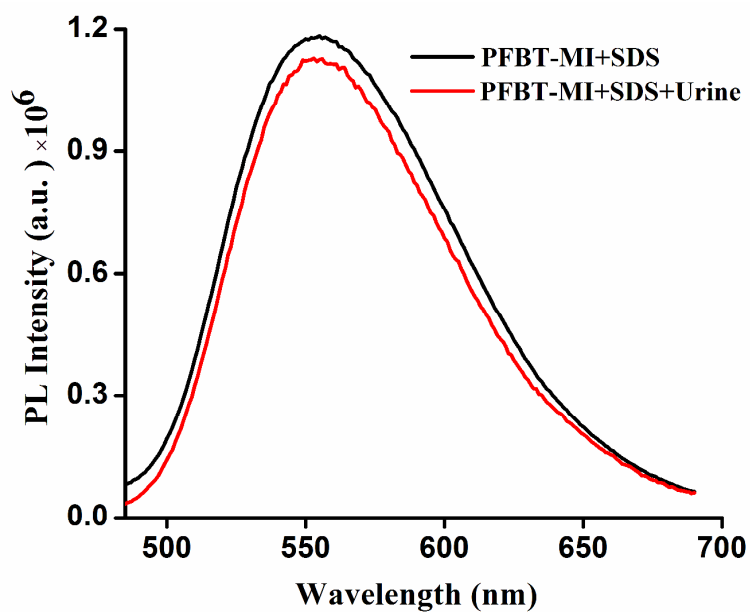

**Figure S17.** Control experiment showing the effect of undoped-urine specimen (10  $\mu$ L) on the emission of PFBT-MI/SDS (6.6  $\mu$ M/ 18  $\mu$ M).

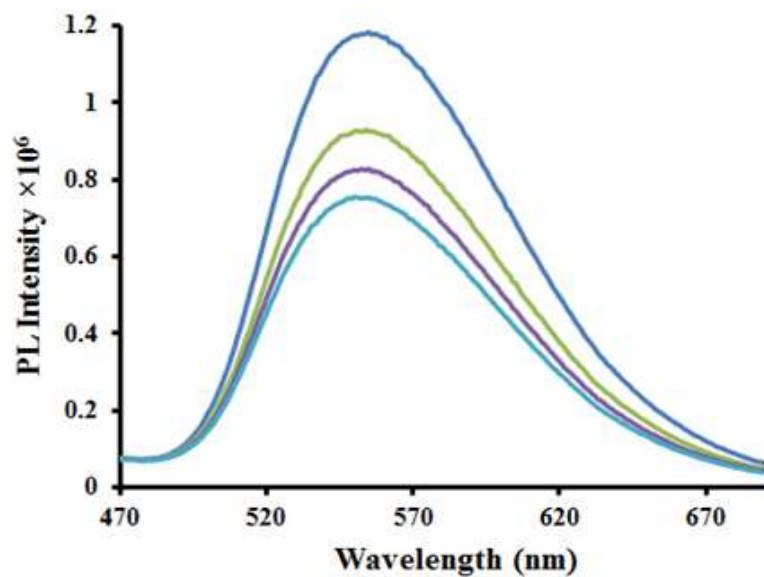

**Figure S18.** Fluorescence quenching of PFBT-MI/SDS (6.6  $\mu\text{M}$ / 18  $\mu\text{M}$ ) assembly on addition of different urine samples spiked with spermine.

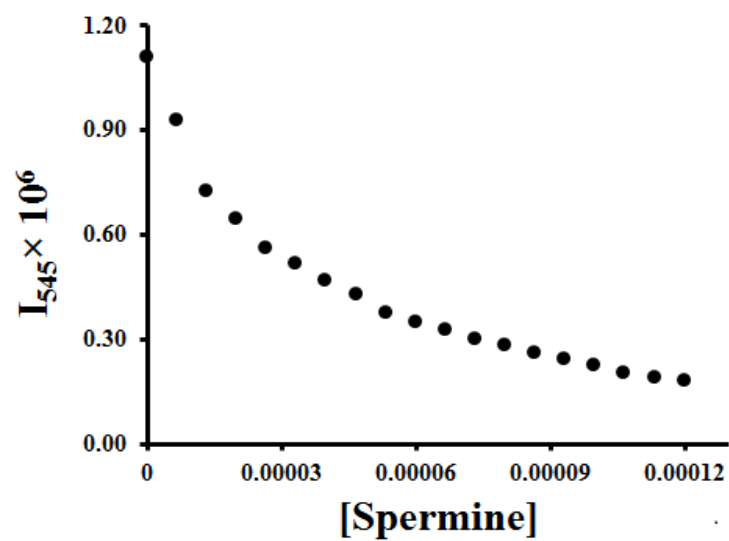

**Figure S19.** Calibration plot for spermine.
